# Supplementary material for: Synbiotics Alleviate Hepatic Damage, Intestinal Injury and Muscular Beclin-1 Elevation in Rats after Chronic Ethanol Administration
Source: MDPI journal article supplement (doi:10.3390/ijms222212547), 2021-11-21
Supplement: s1 [file s1]

Supplementary Table S1. Effects of synbiotics supplementation on plasma amino acid composition in rats with chronic alcohol feeding<sup>1</sup>.

| nM            | C                            | E                            | SC                           | PSE                           | ASE                          |
|---------------|------------------------------|------------------------------|------------------------------|-------------------------------|------------------------------|
| Valine        | 245.19 ± 41.58               | 423.52 ± 196.93              | 228.22 ± 49.80               | 347.22 ± 251.22               | 400.15 ± 216.08              |
| Isoleucine    | 315.18 ± 20.20               | 360.62 ± 32.57               | 335.44 ± 119.90              | 290.68 ± 31.11                | 329.83 ± 53.60               |
| Leucine       | 320.13 ± 18.69 <sup>ab</sup> | 478.34 ± 127.03 <sup>a</sup> | 294.63 ± 49.96 <sup>b</sup>  | 370.45 ± 108.23 <sup>ab</sup> | 362.15 ± 56.41 <sup>ab</sup> |
| ΣBCAAs        | 880.50 ± 55.20               | 1262.48 ± 312.64             | 858.30 ± 211.11              | 1008.36 ± 329.78              | 1092.13 ± 237.87             |
| Phenylalanine | 313.07 ± 89.79 <sup>b</sup>  | 514.39 ± 13.56 <sup>a</sup>  | 330.12 ± 68.80 <sup>b</sup>  | 249.97 ± 22.25 <sup>b</sup>   | 372.44 ± 123.46 <sup>b</sup> |
| Tryptophan    | 33.35 ± 5.56                 | 38.27 ± 0.38                 | 37.19 ± 1.70                 | 33.90 ± 4.71                  | 36.19 ± 1.89                 |
| Tyrosine      | 158.00 ± 17.86 <sup>ab</sup> | 191.25 ± 5.97 <sup>a</sup>   | 160.96 ± 24.58 <sup>ab</sup> | 131.91 ± 31.54 <sup>b</sup>   | 166.03 ± 11.50 <sup>ab</sup> |
| ΣAAAs         | 504.43 ± 102.50 <sup>b</sup> | 743.92 ± 11.91 <sup>a</sup>  | 528.28 ± 82.42 <sup>b</sup>  | 415.79 ± 43.81 <sup>b</sup>   | 574.66 ± 134.20 <sup>b</sup> |
| Methionine    | 20.97 ± 5.31 <sup>b</sup>    | 35.77 ± 5.30 <sup>a</sup>    | 17.75 ± 13.57 <sup>b</sup>   | 4.54 ± 1.50 <sup>c</sup>      | 21.58 ± 4.03 <sup>b</sup>    |
| Histidine     | 1.13 ± 1.96 <sup>b</sup>     | 719.03 ± 549.24 <sup>a</sup> | 132.30 ± 229.15 <sup>b</sup> | 0.00 ± 0.00 <sup>b</sup>      | 15.47 ± 26.79 <sup>b</sup>   |
| Alanine       | 6.40 ± 11.09 <sup>b</sup>    | 52.80 ± 34.01 <sup>a</sup>   | 0.00 ± 0.00 <sup>b</sup>     | 16.80 ± 8.05 <sup>b</sup>     | 15.00 ± 13.85 <sup>b</sup>   |
| Arginine      | 2.95 ± 0.74 <sup>a</sup>     | 1.10 ± 0.36 <sup>b</sup>     | 1.02 ± 0.09 <sup>b</sup>     | 0.68 ± 0.72 <sup>b</sup>      | 1.21 ± 0.46 <sup>b</sup>     |
| Proline       | 42.29 ± 12.12 <sup>b</sup>   | 59.41 ± 6.96 <sup>a</sup>    | 52.36 ± 2.12 <sup>ab</sup>   | 50.37 ± 3.19 <sup>ab</sup>    | 53.63 ± 3.99 <sup>ab</sup>   |
| Lysine        | 4.93 ± 2.53                  | 7.00 ± 1.74                  | 6.44 ± 0.38                  | 4.76 ± 1.17                   | 5.18 ± 1.09                  |
| Glutamine     | 7.76 ± 0.20 <sup>a</sup>     | 6.81 ± 0.53 <sup>ab</sup>    | 6.05 ± 0.53 <sup>b</sup>     | 4.48 ± 0.68 <sup>c</sup>      | 4.18 ± 1.25 <sup>c</sup>     |
| Glutamic acid | 2.78 ± 0.47                  | 2.82 ± 0.39                  | 2.80 ± 0.08                  | 3.14 ± 0.54                   | 2.98 ± 0.28                  |
| Aspartic acid | 0.20 ± 0.14                  | 0.24 ± 0.14                  | 0.22 ± 0.24                  | 0.29 ± 0.22                   | 0.02 ± 0.04                  |
| Asparagine    | 0.00 ± 0.00                  | 0.00 ± 0.00                  | 0.00 ± 0.00                  | 0.00 ± 0.00                   | 0.00 ± 0.00                  |
| Threonine     | 0.00 ± 0.00                  | 0.11 ± 0.19                  | 0.03 ± 0.05                  | 0.00 ± 0.00                   | 0.49 ± 0.85                  |
| Serine        | 0.00 ± 0.00                  | 0.00 ± 0.00                  | 0.00 ± 0.00                  | 0.00 ± 0.00                   | 0.00 ± 0.00                  |

<sup>1</sup> Data are expressed as the mean ± standard deviation (*n* = 6). Different letters (a, b, and c) indicate a significant difference at *p* < 0.05 by a one-way ANOVA with Duncan's post-hoc test.

Supplementary Table S2. Effects of synbiotics supplementation on hepatic amino acid composition in rats with chronic alcohol feeding<sup>1</sup>.

| mM/g protein  | C                           | E                            | SC                           | PSE                        | ASE                        |
|---------------|-----------------------------|------------------------------|------------------------------|----------------------------|----------------------------|
| Valine        | 47.38 ± 18.61               | 41.45 ± 10.03                | 38.32 ± 9.60                 | 32.62 ± 2.71               | 44.07 ± 10.12              |
| Isoleucine    | 55.71 ± 16.30 <sup>a</sup>  | 51.88 ± 7.97 <sup>ab</sup>   | 43.10 ± 10.17 <sup>ab</sup>  | 33.53 ± 6.20 <sup>ab</sup> | 25.85 ± 23.40 <sup>b</sup> |
| Leucine       | 63.41 ± 30.60 <sup>a</sup>  | 42.30 ± 16.15 <sup>ab</sup>  | 35.38 ± 11.20 <sup>ab</sup>  | 16.12 ± 3.17 <sup>b</sup>  | 19.03 ± 14.76 <sup>b</sup> |
| ΣBCAAs        | 166.50 ± 48.43 <sup>a</sup> | 135.63 ± 24.98 <sup>ab</sup> | 116.80 ± 29.96 <sup>ab</sup> | 82.27 ± 11.76 <sup>b</sup> | 88.95 ± 34.40 <sup>b</sup> |
| Phenylalanine | 54.47 ± 18.37 <sup>a</sup>  | 45.48 ± 7.63 <sup>ab</sup>   | 34.59 ± 8.33 <sup>b</sup>    | 30.16 ± 2.02 <sup>b</sup>  | 38.06 ± 3.81 <sup>ab</sup> |
| Tryptophan    | 1.44 ± 0.45 <sup>a</sup>    | 1.18 ± 0.14 <sup>ab</sup>    | 1.13 ± 0.27 <sup>ab</sup>    | 0.81 ± 0.07 <sup>b</sup>   | 1.00 ± 0.08 <sup>ab</sup>  |
| Tyrosine      | 40.00 ± 11.25 <sup>a</sup>  | 36.44 ± 6.34 <sup>ab</sup>   | 28.44 ± 6.95 <sup>ab</sup>   | 25.05 ± 2.74 <sup>b</sup>  | 30.82 ± 3.09 <sup>ab</sup> |
| ΣAAAs         | 95.92 ± 29.40 <sup>a</sup>  | 83.11 ± 14.10 <sup>ab</sup>  | 64.16 ± 15.53 <sup>ab</sup>  | 56.03 ± 4.76 <sup>b</sup>  | 69.88 ± 6.84 <sup>ab</sup> |
| Methionine    | 14.16 ± 11.37               | 9.91 ± 4.98                  | 16.96 ± 2.35                 | 8.80 ± 1.43                | 13.04 ± 4.26               |
| Histidine     | 2.70 ± 0.96 <sup>a</sup>    | 2.20 ± 0.22 <sup>ab</sup>    | 0.82 ± 1.08 <sup>b</sup>     | 1.57 ± 0.19 <sup>ab</sup>  | 1.33 ± 1.07 <sup>ab</sup>  |
| Alanine       | 0.24 ± 0.04 <sup>ab</sup>   | 0.34 ± 0.07 <sup>a</sup>     | 0.21 ± 0.07 <sup>b</sup>     | 0.18 ± 0.03 <sup>b</sup>   | 0.29 ± 0.07 <sup>ab</sup>  |
| Arginine      | 0.07 ± 0.02                 | 0.04 ± 0.01                  | 0.06 ± 0.03                  | 0.04 ± 0.01                | 0.04 ± 0.01                |
| Proline       | 11.97 ± 2.88 <sup>b</sup>   | 21.65 ± 5.87 <sup>a</sup>    | 20.10 ± 4.90 <sup>ab</sup>   | 14.72 ± 1.00 <sup>ab</sup> | 20.86 ± 2.62 <sup>ab</sup> |
| Lysine        | 4.18 ± 3.87                 | 3.53 ± 1.92                  | 2.92 ± 1.06                  | 1.80 ± 0.62                | 1.70 ± 0.67                |
| Glutamine     | 5.27 ± 3.08 <sup>a</sup>    | 2.43 ± 0.36 <sup>ab</sup>    | 2.73 ± 1.31 <sup>ab</sup>    | 2.18 ± 0.28 <sup>b</sup>   | 2.22 ± 0.10 <sup>b</sup>   |
| Glutamic acid | 3.56 ± 0.15 <sup>a</sup>    | 2.06 ± 0.49 <sup>b</sup>     | 2.77 ± 0.19 <sup>ab</sup>    | 2.08 ± 0.41 <sup>b</sup>   | 2.54 ± 0.81 <sup>b</sup>   |
| Aspartic acid | 5.54 ± 2.84                 | 5.88 ± 2.73                  | 4.74 ± 1.11                  | 4.68 ± 1.53                | 5.77 ± 2.12                |
| Asparagine    | 0.00 ± 0.00                 | 0.00 ± 0.00                  | 0.00 ± 0.00                  | 0.00 ± 0.00                | 0.00 ± 0.00                |
| Threonine     | 6.41 ± 7.19                 | 2.59 ± 2.46                  | 3.28 ± 2.62                  | 0.92 ± 0.70                | 2.97 ± 0.22                |
| Serine        | 0.0000 ± 0.0000             | 0.0000 ± 0.0000              | 0.0009 ± 0.0015              | 0.0000 ± 0.0000            | 0.0008 ± 0.0013            |

<sup>1</sup> Data are expressed as the mean ± standard deviation ( $n = 6$ ). Different letters (a and b) indicate a significant difference at  $p < 0.05$  by a one-way ANOVA with Duncan's post-hoc test.

Supplementary Table S3. Effects of synbiotics on supplementation on muscle amino acid composition in rats with chronic alcohol feeding<sup>1</sup>.

| mM/g protein  | C                          | E                            | SC                          | PSE                         | ASE                         |
|---------------|----------------------------|------------------------------|-----------------------------|-----------------------------|-----------------------------|
| Valine        | 18.18 ± 17.30              | 30.52 ± 5.85                 | 48.06 ± 28.55               | 24.57 ± 7.16                | 20.38 ± 8.53                |
| Isoleucine    | 19.32 ± 6.13               | 50.74 ± 30.80                | 62.66 ± 37.97               | 24.87 ± 8.42                | 47.51 ± 19.61               |
| Leucine       | 34.16 ± 13.70              | 45.13 ± 10.10                | 48.67 ± 21.56               | 34.31 ± 10.15               | 66.76 ± 27.46               |
| ΣBCAAs        | 71.65 ± 30.63              | 126.39 ± 39.23               | 159.39 ± 80.58              | 83.75 ± 20.33               | 134.65 ± 36.85              |
| Phenylalanine | 33.64 ± 23.88 <sup>b</sup> | 65.79 ± 21.29 <sup>ab</sup>  | 88.38 ± 27.22 <sup>a</sup>  | 51.57 ± 23.39 <sup>ab</sup> | 46.65 ± 17.13 <sup>ab</sup> |
| Tryptophan    | 1.29 ± 0.69                | 1.48 ± 0.85                  | 2.02 ± 0.64                 | 1.14 ± 0.42                 | 2.35 ± 1.87                 |
| Tyrosine      | 19.27 ± 8.88               | 33.87 ± 11.16                | 64.67 ± 57.31               | 18.85 ± 7.18                | 37.40 ± 11.36               |
| ΣAAAs         | 54.20 ± 30.47 <sup>b</sup> | 101.14 ± 27.49 <sup>ab</sup> | 155.08 ± 84.68 <sup>a</sup> | 71.56 ± 30.96 <sup>ab</sup> | 86.39 ± 22.36 <sup>ab</sup> |
| Methionine    | 2.90 ± 1.69 <sup>b</sup>   | 5.29 ± 0.80 <sup>ab</sup>    | 9.58 ± 5.16 <sup>a</sup>    | 4.49 ± 1.71 <sup>ab</sup>   | 5.73 ± 1.75 <sup>ab</sup>   |
| Histidine     | 0.29 ± 0.28                | 1.38 ± 1.14                  | 1.30 ± 1.02                 | 0.72 ± 0.22                 | 1.25 ± 0.69                 |
| Alanine       | 0.18 ± 0.17                | 0.19 ± 0.15                  | 0.30 ± 0.14                 | 0.13 ± 0.03                 | 0.43 ± 0.32                 |
| Arginine      | 0.20 ± 0.06                | 0.27 ± 0.22                  | 0.45 ± 0.14                 | 0.22 ± 0.11                 | 0.38 ± 0.21                 |
| Proline       | 3.29 ± 2.32                | 5.28 ± 1.81                  | 5.64 ± 2.55                 | 3.28 ± 1.79                 | 4.03 ± 2.03                 |
| Lysine        | 0.39 ± 0.11 <sup>b</sup>   | 0.51 ± 0.35 <sup>ab</sup>    | 1.10 ± 0.52 <sup>a</sup>    | 0.25 ± 0.08 <sup>b</sup>    | 0.77 ± 0.33 <sup>ab</sup>   |
| Glutamine     | 0.37 ± 0.22                | 0.29 ± 0.33                  | 0.38 ± 0.35                 | 0.22 ± 0.04                 | 0.43 ± 0.24                 |
| Glutamic acid | 1.38 ± 0.99 <sup>b</sup>   | 2.51 ± 0.97 <sup>b</sup>     | 5.58 ± 2.81 <sup>a</sup>    | 1.76 ± 0.51 <sup>b</sup>    | 1.99 ± 1.16 <sup>b</sup>    |
| Aspartic acid | 0.11 ± 0.05 <sup>ab</sup>  | 0.01 ± 0.02 <sup>b</sup>     | 0.27 ± 0.26 <sup>a</sup>    | 0.09 ± 0.03 <sup>ab</sup>   | 0.06 ± 0.05 <sup>ab</sup>   |
| Asparagine    | 0.00 ± 0.00                | 0.00 ± 0.00                  | 0.00 ± 0.00                 | 0.00 ± 0.00                 | 0.00 ± 0.00                 |
| Threonine     | 0.0000 ± 0.0000            | 0.0000 ± 0.0000              | 0.0087 ± 0.0150             | 0.0000 ± 0.0000             | 0.1259 ± 0.2181             |
| Serine        | 0.00 ± 0.00                | 0.00 ± 0.00                  | 0.00 ± 0.00                 | 0.00 ± 0.00                 | 0.00 ± 0.00                 |

<sup>1</sup> Data are expressed as the mean ± standard deviation ( $n = 6$ ). Different letters (a and b) indicate a significant difference at  $p < 0.05$  by a one-way ANOVA with Duncan's post-hoc test.
